## SPINE SECTION

### Original Research Article

# The Impact of Body Mass Index on Fluoroscopy Time During Lumbar Epidural Steroid Injection; A Multicenter Cohort Study

Zachary L. McCormick, MD,\* Sarah C. Choksi, MD,<sup>†</sup> David T. Lee, MD,<sup>‡</sup> Austin Marcolina, MS,<sup>§</sup> Joel Press, MD,<sup>¶</sup> DJ Kennedy, MD,<sup>||</sup> Matthew Smuck, MD,<sup>||</sup> David R. Walega, MD,<sup>†</sup> and Daniel M. Cushman, MD<sup>§</sup>

\*Department of Physical Medicine & Rehabilitation/Department of Anesthesia, Northwestern Feinberg School of Medicine/the Rehabilitation Institute of Chicago, Chicago, Illinois; <sup>†</sup>Department of Anesthesia, Northwestern Feinberg School of Medicine, Chicago, Illinois; <sup>‡</sup>Department of Medicine, University of Illinois College of Medicine, Chicago, Illinois; <sup>§</sup>Midwestern University, School of Medicine, Downers Grove, Illinois; <sup>¶</sup>Department of Physical Medicine & Rehabilitation, the Rehabilitation Institute of Chicago, Chicago, Illinois; <sup>||</sup>Department of Orthopaedics, Stanford University, Palo Alto, California; <sup>§</sup>Department of PM&R, University of Utah, Salt Lake City, Utah, USA

*Correspondence to:* Zachary McCormick, MD, Department of Physical Medicine and Rehabilitation, Rehabilitation Institute of Chicago, McGaw Medical Center, Northwestern University Feinberg School of Medicine, Chicago, IL 60611, USA. Tel: 510-388-7084; E-mail: zmccormi@gmail.com.

Funding sources: No direct or indirect support was provided for this study.

Conflicts of interest: None of the authors report any conflict of interest.

Disclosure: This research was approved by the Northwestern University Institutional Review Board.

### Abstract

**Objective.** This study aimed to assess the relationship between BMI and fluoroscopy time during lumbar epidural steroid injections (LESIs) performed for lumbosacral radicular pain.

**Design.** Multicenter retrospective cohort study.

**Setting.** Three academic, outpatient pain treatment centers.

**Subjects.** Patients who underwent fluoroscopically guided LESI.

**Methods.** Mean and standard deviation (SD) fluoroscopy time were compared between patients with normal (18.5–24.9 kg/m<sup>2</sup>), overweight (25.0–29.9 kg/m<sup>2</sup>), and obese (≥30.0 kg/m<sup>2</sup>) BMI. Statistical significance was set at  $P=0.01$  due to multiple comparisons.

**Results.** A total of 2,930 procedure encounters were included, consisting of 598 interlaminar LESIs and 2,332 transforaminal LESIs. Fluoroscopy time was significantly longer in the obese patients compared to normal and overweight patients during interlaminar LESI ( $P<0.01$ ). Fluoroscopy time was significantly longer with each increasing BMI category in during transforaminal LESI ( $P<0.01$ ). These relationships remained when a trainee was involved ( $P<0.01$ ;  $P<0.01$ ), during repeat injections ( $P<0.01$ ;  $P<0.01$ ), and during bilateral transforaminal LESIs ( $P<0.01$ ). While longer fluoroscopy times were required in high BMI categories during L5-S1 transforaminal LESI ( $P<0.01$ ), there was no relationship between fluoroscopy time and BMI during L4-L5 and S1 transforaminal LESI ( $P=0.02$ ;  $P=0.13$ ). Fluoroscopy time during interlaminar LESI compared to transforaminal LESI was significantly lower within all BMI categories (all  $P<0.01$ ).

**Conclusions.** The findings of this study indicate that fluoroscopy time is increased during interlaminar LESIs and during L5-S1 transforaminal LESIs in patients who are obese. These relationships are not affected by injection number, performance of bilateral injections, or trainee involvement. Further study is needed to determine if this increase in fluoroscopy time is indicative of a clinically significant associated increase in radiation dose.

**Key Words.** Lumbar; Epidural; Interlaminar; Transforaminal; Injections; Obesity; Overweight; Body Mass Index; Fluoroscopy; Radiation

## Introduction

Lumbar epidural steroid injections are commonly performed for low back pain with radicular symptoms [1]. Particularly in patients with an acute to subacute disc herniation with radicular pain, epidural steroid injection can be helpful for improving pain and function, as well as preventing spinal surgery [2–10]. The safe and effective performance of epidural steroid injections requires the use of fluoroscopic guidance [11–13].

While common co-morbidities in individuals who are candidates for epidural steroid injections include cardiovascular disease, asthma, headache/migraine, osteoporosis, and mood disorders [14–18], obesity is perhaps the most common [17]. High body mass index (BMI) introduces challenges in obtaining medical imaging, resulting in the need for increased radiation exposure in some cases [19,20]. Radiation during interventional procedures has potential health implications for both patients and healthcare providers, particularly given the cumulative effect of radiation exposure [21–23]. The short-term risk to patients is radiation-induced skin damage, which can result from acute radiation doses greater than or equal to 2Gy. Reports of skin changes on the hands, injuries to the lens of the eye, and cataracts in operators and assistants underscore the risk to care providers [24,25]. Although cancer is uncommon, malignancy associated with radiation exposure in adults may include leukemia and breast cancer [25,26].

Though a range of interventional and surgical procedures have been associated with longer fluoroscopy times and greater radiation exposure with increasing BMI [27–30], few studies have analyzed this relationship during spine injections for pain management [31–35]. The present study aimed to define the relationship between BMI and fluoroscopy time during lumbar epidural steroid injections (LESIs) performed for lumbosacral radicular pain. Relationships specific to interlaminar and transforaminal LESI approaches, repeat injections, bilateral transforaminal LESIs, and procedures in which a trainee was involved were additionally investigated.

## Methods

### Study Sites

This was a multicenter retrospective cohort study, approved by the Northwestern University Institution Review Board. Electronic medical records were queried at three urban academic, outpatient spine/pain treatment centers using current procedural terminology codes for both interlaminar and transforaminal LESIs in order to identify eligible patients for analysis. The Rehabilitation Institute of Chicago (RIC) Sports and Spine Rehabilitation Center (SSRC), the RIC Sports and Spine Center at River Forest (SSCRF), and the Northwestern Memorial Faculty Foundation (NMFF)

Anesthesiology Pain Medicine Center. The RIC SSRC and the RIC SSCRf are both managed under the umbrella institution of RIC (affiliated with, but not a part of, the Northwestern University hospital system). There was attending physician and trainee overlap between these two sites, but less than 25%. The NMFF Anesthesiology Pain Medicine Center is a separate clinical practice that is part of a distinct institution (Northwestern University) with no overlap of attending physicians or trainees at either of the two RIC clinical sites.

### Procedures

At all three study sites, LESIs were performed in the following manner: Patients were positioned prone on a fluoroscopy table and the lumbosacral region was prepped with chlorhexidine and draped in a standard sterile manner. The skin and subcutaneous tissues were anesthetized with 1% preservative-free lidocaine. A sterile, 3.5- or 6.0-inch, 17- or 20-gauge Tuohy needle for interlaminar LESIs, or a sterile, 2.5- or 7.0-inch, 22- or 25-gauge spinal needle for transforaminal LESIs was positioned using fluoroscopic guidance. For interlaminar LESIs, the needle was advanced at the midline space between the lamina of the lumbar vertebrae. A paramedian approach was taken when radicular symptoms were clearly unilateral and the attending physician elected to perform an interlaminar LESI rather than a transforaminal LESI. For transforaminal LESIs, the subpedicular approach was used [13].

During both interlaminar and transforaminal LESI, appropriate needle placement in the epidural space was confirmed in both anterior-posterior and lateral fluoroscopic views following negative aspiration and injection of approximately 1.5–2 mL of contrast through microbore tubing, with live-fluoroscopy observation in the anterior-posterior view. One to three milliliters of corticosteroid were injected depending on attending preference, which included triamcinolone acetonide (40mg/mL), methylprednisolone acetate (40mg/mL), or dexamethasone (4mg/mL or 10mg/mL) diluted in 1.0–3.0 mL of various combinations of 1% lidocaine or 0.9% normal saline. This injectate was administered through microbore tubing. For bilateral transforaminal LESIs, the steps after skin prep and draping were repeated. The route of entry to the epidural space (interlaminar vs. transforaminal) was at the attending's discretion. Digital subtraction technology was used at the discretion of the attending physician, when the presence of vascular contrast pattern was possible but not certain during observation of contrast injection under live fluoroscopy. In this cohort, digital subtraction technology was not used during interlaminar LESIs, and rarely (<1% of the time) during transforaminal LESIs. More commonly, the spinal needle was repositioned in cases when the presence of a vascular flow pattern was not clear.

An attending physician supervised and/or personally performed all of the LESI procedures. A total of 23 attending physicians, with a range of five to 38 years

of clinical experience, performed LESIs. All were board-certified in Physical Medicine and Rehabilitation (PM&R) or Anesthesiology, with subspecialty board-certification in either Pain Medicine or Sports Medicine. Trainees in an ACGME-accredited PM&R residency, Anesthesiology residency, Sports Medicine fellowship, or Multidisciplinary Pain Medicine fellowship participated in the LESI procedure.

### **Data Collection**

Consecutive patients treated at the two RIC sites between April, 2007 and October, 2014 and the NMFF site between January, 2014 and February, 2015 were included in the study if they met the following inclusion criteria: [1] received a fluoroscopically guided LESI; [2] had a documented fluoroscopy time from the procedure; [3] had documented height and weight measurements in the electronic medical record within six months of the encounter. Patients who underwent a LESI that did not meet these criteria were excluded from the analysis.

At all three study sites, fluoroscopy times were recorded directly from the fluoroscope and transposed into the electronic medical record. In addition to collecting fluoroscopy time by electronic medical record review, the following demographic and procedural characteristics were recorded from each individual procedure encounter: age, sex, BMI, needle length used, type and level of injection, trainee involvement, trainee duration of training, and in the case of transforaminal LESIs the unilateral side of injection or performance of a bilateral procedure. In the case of bilateral transforaminal LESIs, the total fluoroscopy time was divided by two in order to estimate the fluoroscopy time per injection.

Data were stratified into three BMI categories: normal (BMI 18.5–24.9 kg/m<sup>2</sup>), overweight (BMI 25.0–29.9 kg/m<sup>2</sup>), and obese (BMI ≥30.0 kg/m<sup>2</sup>). The mean fluoroscopy time required per injection was compared among these three BMI categories. In order to identify relationships within subgroups of patients who received LESIs, results were further stratified by [1] the route of injection (interlaminar vs. transforaminal), [2] injection number (first vs. repeat), [3] level of injection (i.e., L1-L2, L2-L3, etc), [4] trainee involvement (yes vs. no), [5] new trainee involvement (defined as July or August; i.e., the start of the new academic year) and, for transforaminal LESIs, [6] bilateral injections (yes vs. no).

### **Statistical Analysis**

A statistical software package was used to analyze the data (PSPP, Version 0.8.4; Gnu Project, Boston, MA). The distributional form of the data was checked using summary statistics and graphical displays. Groups were compared with analysis of variance testing for continuous variables and  $\chi^2$  tests for categorical variables. A Bonferroni correction was used given multiple

comparisons so that the level of significance was reduced to 0.01.

### **Results**

A total of 3,140 procedure encounters were identified; 210 procedures were excluded from further analysis due to missing BMI or fluoroscopy time data. The resulting data included a total of 2,930 procedure encounters, consisting of 598 interlaminar LESIs and 2,332 transforaminal LESIs. Demographic and procedural characteristics of the study population, separated by interlaminar and transforaminal LESI, are shown in [Tables 1](#) and [2](#), respectively. Comparison of fluoroscopy time in various BMI classes as well as relevant subgroup analyses are shown for both interlaminar LESIs and transforaminal LESIs in [Tables 3](#) and [4](#), respectively. Fluoroscopy time plotted by BMI with the level of injection indicated for each individual injection is shown for both interlaminar and transforaminal LESIs in [Figures 1](#) and [2](#). Interlaminar LESIs were only performed at the NMFF study site. Of the procedures performed at the NMFF study site, fluoroscopy time during interlaminar LESI compared to transforaminal LESI was significantly lower within all BMI categories (all  $P < 0.01$ ).

#### **Interlaminar LESI**

Patients who underwent interlaminar LESI had a mean age of 61 years (SD 16), with 63% being female, and the overall average fluoroscopy time was 17.4 seconds (9.8). The mean BMI in the normal weight, overweight, and obese interlaminar LESI groups was 22 kg/m<sup>2</sup> (SD 2), 27 kg/m<sup>2</sup> (SD 1.5), and 36 kg/m<sup>2</sup> (SD 6.2), respectively. There was a significant difference in the mean fluoroscopy time recorded between these BMI classes during interlaminar LESI ( $P < 0.01$ ), with obese patients requiring the longest fluoroscopy times. Trainees were involved in 86% of interlaminar LESI procedures, and this involvement was not associated with a significant difference in fluoroscopy time between BMI classes ( $P = 0.02$ ).

#### **Transforaminal LESI**

Patients who underwent transforaminal LESI had a mean age of 57 years (SD 16), with 53% being female, and the overall average fluoroscopy time was 22.2 seconds (13.5). The mean BMI in the normal weight, overweight, and obese transforaminal LESI groups was 22 kg/m<sup>2</sup> (SD 1.9), 27 kg/m<sup>2</sup> (SD 1.3), and 34 kg/m<sup>2</sup> (SD 4.3), respectively. There was a significant difference in the mean fluoroscopy time recorded between these BMI classes ( $P < 0.01$ ), with obese patients requiring the longest fluoroscopy times. Trainees were involved in 68% of transforaminal LESI procedures, and this involvement was associated with significantly longer fluoroscopy time in increasing BMI classes ( $P < 0.01$ ). While longer fluoroscopy times were required in obese patients during L5-S1 transforaminal LESI ( $P < 0.01$ ) there was no significant relationship between fluoroscopy time and BMI

**Table 1** Subject characteristics and procedure details for fluoroscopically guided interlaminar lumbar epidural steroid injections; stratified by normal body mass index (BMI 18.5–24.9 kg/m<sup>2</sup>), overweight (BMI 25.0–29.9 kg/m<sup>2</sup>), and obese (BMI ≥30.0 kg/m<sup>2</sup>)

| Variable                           | All procedures<br>n = 598 | Normal weight<br>n = 184 | Overweight<br>n = 163 | Obese<br>n = 251 | Normal weight<br>vs. overweight<br>vs. obese<br>P value |
|------------------------------------|---------------------------|--------------------------|-----------------------|------------------|---------------------------------------------------------|
| Age, y; mean (SD)                  | 61 (16)                   | 61 (17)                  | 61 (16)               | 60 (14)          | 0.54                                                    |
| Gender, n (%)                      |                           |                          |                       |                  |                                                         |
| Female                             | 374 (63%)                 | 131 (80%)                | 86 (53%)              | 157 (63%)        | <0.01                                                   |
| Male                               | 224 (37%)                 | 53 (20%)                 | 77 (47%)              | 94 (37%)         |                                                         |
| BMI, kg/m <sup>2</sup> ; mean (SD) | 30 (7.4)                  | 22 (2.0)                 | 27 (1.5)              | 36 (6.2)         | <0.01                                                   |
| Trainee involvement                | 516 (86%)                 | 159 (86%)                | 136 (83%)             | 221 (88%)        | 0.41                                                    |
| Repeat injection                   | 299 (50%)                 | 90 (49%)                 | 77 (47%)              | 132 (53%)        | 0.53                                                    |
| Level of injection                 |                           |                          |                       |                  |                                                         |
| L1-L2                              | 9 (1%)                    | 5 (3%)                   | 2 (1%)                | 2 (1%)           | 0.25                                                    |
| L2-L3                              | 19 (3%)                   | 4 (2%)                   | 6 (4%)                | 9 (4%)           | 0.65                                                    |
| L3-L4                              | 53 (8%)                   | 19 (10%)                 | 13 (8%)               | 21 (8%)          | 0.70                                                    |
| L4-L5                              | 224 (37%)                 | 67 (37%)                 | 61 (37%)              | 96 (38%)         | 0.93                                                    |
| L5-S1                              | 293 (49%)                 | 89 (48%)                 | 81 (50%)              | 123 (49%)        | 0.97                                                    |
| Length of needle, inches           |                           |                          |                       |                  |                                                         |
| 3.5                                | 541 (91%)                 | 182 (100%)               | 159 (99%)             | 197 (79%)        | <0.01                                                   |
| 6.0                                | 54 (9%)                   | 0 (0%)                   | 2 (1%)                | 52 (21%)         |                                                         |

n = number of procedure encounters; SD = standard deviation.

during L4-L5 or S1 transforaminal LESI ( $P=0.02$ ,  $P=0.13$ ).

No serious adverse events occurred.

## Discussion

The results of this study demonstrated that fluoroscopy time is significantly longer in obese patients compared to normal and overweight patients during interlaminar LESIs, while fluoroscopy time increases significantly with each progressively larger BMI category during transforaminal LESIs. These relationships were not affected by involvement of either a “new” (July/August) or “seasoned” (September–June) trainee in the procedure, by the performance of a repeat as opposed to first-time injection, or by the performance of a bilateral procedure in the case of transforaminal LESIs. When transforaminal LESIs were stratified by level, the above described relationship remained for L5-S1 level but not for L4-L5 and S1 level LESIs.

These results confirm prior smaller studies suggesting a relationship between BMI and fluoroscopy time with regard to lumbar epidural steroid injections [31–33]. The present data represents the largest sample to date with nearly 3,000 injections, gathered from multiple centers, and thus may be considered a more accurate estimate of typical fluoroscopy times during LESI in academic interventional practice.

Smuck et al. (total  $n=209$ ) reported fluoroscopy time data from a combination of zygapophyseal joint injections, medial branch nerve blocks, and transforaminal epidural steroid injections. These authors used a two-group comparison between normal weight (BMI 18.5–24.9 kg/m<sup>2</sup>) and overweight (BMI ≥25.0 kg/m<sup>2</sup>) individuals, which demonstrated a significant increase in fluoroscopy time during procedures with a mean of 3 additional seconds per injection in the overweight group [31]. There was no sub-analysis by injection type, so while the majority of these injections were transforaminal LESIs ( $n=113$ ), it is not known if this relationship would have remained true when excluding the extra-axial injections investigated in this study. In another study conducted by Hanu-Cernat et al. ( $n=127$ ), a weak correlation between weight (though not BMI) and fluoroscopy dose per unit area was demonstrated for a mix of spinal injections including lumbar medial branch blocks, caudal and interlaminar epidurals, intra-articular facet injections, sacroiliac joint injections, and lumbar radiofrequency ablation of the medial branch nerves [32]. Similar to Smuck et al.’s study, these authors did not stratify data by injection type, so the relationship between weight and fluoroscopy time specifically for LESI cannot be inferred from the data provided, particularly given that only 17 of the procedures included were LESIs. The present study, therefore, provides more definitive evidence that fluoroscopy time is increased in patients with greater body habitus during LESI. This is likely due to a combination of a greater depth of tissue

**Table 2** Patient characteristics and procedure details for fluoroscopically guided lumbar transforaminal epidural steroid injections; stratified by normal body mass index (BMI 18.5–24.9 kg/m<sup>2</sup>), overweight (BMI 25.0–29.9 kg/m<sup>2</sup>), and obese (BMI ≥30.0 kg/m<sup>2</sup>)

| Variable                           | All procedures<br>n = 2332 | Normal weight<br>n = 775 | Overweight<br>n = 866 | Obese<br>n = 691 | Normal weight<br>vs. overweight<br>vs. obese<br>P value |
|------------------------------------|----------------------------|--------------------------|-----------------------|------------------|---------------------------------------------------------|
| Age, y; mean (SD)                  | 57 (16)                    | 57 (17)                  | 58 (16)               | 57 (14)          | 0.12                                                    |
| Gender, n (%)                      |                            |                          |                       |                  |                                                         |
| Female                             | 1246 (53%)                 | 461 (60%)                | 420 (49%)             | 365 (53%)        | <b>&lt;0.01</b>                                         |
| Male                               | 1086 (47%)                 | 314 (40%)                | 446 (51%)             | 326 (47%)        |                                                         |
| BMI, kg/m <sup>2</sup> ; mean (SD) | 28 (5.5)                   | 22 (1.9)                 | 27 (1.3)              | 34 (4.3)         | <b>&lt;0.01</b>                                         |
| Trainee involvement                | 1576 (68%)                 | 506 (65%)                | 592 (68%)             | 478 (69%)        | 0.24                                                    |
| Repeat injection                   | 811 (38%)                  | 237 (34%)                | 325 (41%)             | 249 (40%)        | <b>0.01</b>                                             |
| Side of injection                  |                            |                          |                       |                  |                                                         |
| Left                               | 861 (41%)                  | 301 (43%)                | 328 (41%)             | 232 (38%)        | 0.15                                                    |
| Right                              | 1063 (50%)                 | 332 (48%)                | 407 (51%)             | 322 (52%)        |                                                         |
| Bilateral                          | 186 (9%)                   | 64 (9%)                  | 60 (8%)               | 62 (10%)         |                                                         |
| Foraminal level of injection       |                            |                          |                       |                  |                                                         |
| L1-L2                              | 6 (<1%)                    | 2 (<1%)                  | 3 (<1%)               | 1 (<1%)          | 0.74                                                    |
| L2-L3                              | 42 (2%)                    | 6 (<1%)                  | 18 (2%)               | 18 (2%)          | <b>0.02</b>                                             |
| L3-L4                              | 182 (8%)                   | 59 (7%)                  | 56 (6%)               | 67 (9%)          | 0.06                                                    |
| L4-L5                              | 548 (23%)                  | 194 (24%)                | 201 (22%)             | 149 (21%)        | 0.16                                                    |
| L5-S1                              | 1301 (53%)                 | 425 (53%)                | 494 (61%)             | 380 (53%)        | 0.60                                                    |
| S1                                 | 343 (14%)                  | 119 (15%)                | 122 (14%)             | 102 (14%)        | 0.77                                                    |
| Length of needle, inches           |                            |                          |                       |                  |                                                         |
| 2.5                                | 3 (<1%)                    | 3 (<1%)                  | 0 (0%)                | 0 (0%)           | <b>&lt;0.01</b>                                         |
| 3.5                                | 1380 (59%)                 | 604 (78%)                | 565 (65%)             | 211 (31%)        |                                                         |
| 5.0                                | 879 (38%)                  | 164 (21%)                | 286 (33%)             | 429 (62%)        |                                                         |
| 7.0                                | 37 (2%)                    | 0 (0%)                   | 6 (1%)                | 37 (5%)          |                                                         |

n = number of procedure encounters; SD = standard deviation.

**Table 3** Fluoroscopy time during lumbar interlaminar epidural steroid injection for normal body mass index (BMI 18.5 - 24.9 kg/m<sup>2</sup>), overweight (BMI 25.0–29.9 kg/m<sup>2</sup>), and obese (BMI ≥30.0 kg/m<sup>2</sup>) individuals

| Variable                | n   | Fluoroscopy<br>time per<br>injection, s;<br>mean (SD)<br>normal weight | Fluoroscopy<br>time per<br>injection, s;<br>mean (SD)<br>overweight | Fluoroscopy<br>time per<br>injection, s;<br>mean (SD)<br>obese | P value         |
|-------------------------|-----|------------------------------------------------------------------------|---------------------------------------------------------------------|----------------------------------------------------------------|-----------------|
| All injections          | 598 | 16 (9.6)                                                               | 16 (8.6)                                                            | 19 (10)                                                        | <b>&lt;0.01</b> |
| Repeat injections       | 299 | 15 (0.8)                                                               | 14 (0.6)                                                            | 18 (0.7)                                                       | <b>&lt;0.01</b> |
| Level of injection      |     |                                                                        |                                                                     |                                                                |                 |
| L4-L5                   | 224 | 17 (11)                                                                | 17 (10)                                                             | 20 (10)                                                        | 0.04            |
| L5-S1                   | 293 | 15 (8)                                                                 | 15 (8)                                                              | 18 (10)                                                        | 0.06            |
| Trainee involvement     | 516 | 17 (9.8)                                                               | 17 (9.1)                                                            | 19 (10)                                                        | 0.02            |
| New trainee involvement | 90  | 20 (14)                                                                | 15 (5.2)                                                            | 21 (13)                                                        | 0.16            |

n = number of procedure encounters; SD = standard deviation; new trainee = injection performed with trainee in July or August.



**Table 4** Fluoroscopy time during lumbar transforaminal epidural steroid injection for normal body mass index (BMI 18.5–24.9 kg/m<sup>2</sup>), overweight (BMI 25.0–29.9 kg/m<sup>2</sup>), and obese (BMI ≥30.0 kg/m<sup>2</sup>) individuals

| Variable                | n    | Fluoroscopy time per injection, s; mean (SD) normal BMI | Fluoroscopy time per injection, s; mean (SD) overweight | Fluoroscopy time per injection, s; mean (SD) obese | P value |
|-------------------------|------|---------------------------------------------------------|---------------------------------------------------------|----------------------------------------------------|---------|
| All injections          | 2332 | 24 (16)                                                 | 26 (23)                                                 | 29 (17)                                            | <0.01   |
| Repeat injections       | 878  | 22 (12)                                                 | 26 (15)                                                 | 26 (12)                                            | <0.01   |
| Bilateral Injections    | 186  | 21 (10)                                                 | 25 (13)                                                 | 29 (17)                                            | <0.01   |
| Level of injection      |      |                                                         |                                                         |                                                    |         |
| L4-L5                   | 548  | 24 (16)                                                 | 24 (13)                                                 | 28 (16)                                            | 0.02    |
| L5-S1                   | 1301 | 23 (11)                                                 | 26 (23)                                                 | 29 (16)                                            | <0.01   |
| S1                      | 343  | 26 (22)                                                 | 30 (32)                                                 | 33 (25)                                            | 0.13    |
| Trainee involvement     | 1577 | 23 (15)                                                 | 26 (21)                                                 | 29 (16)                                            | <0.01   |
| New trainee involvement | 206  | 26 (22)                                                 | 24 (14)                                                 | 30 (20)                                            | 0.10    |

n = number of procedure encounters; SD = standard deviation; new trainee = injection performed with trainee in July or August. Bilateral injection fluoroscopy time = total time fluoroscopy time for both sides divided by two.

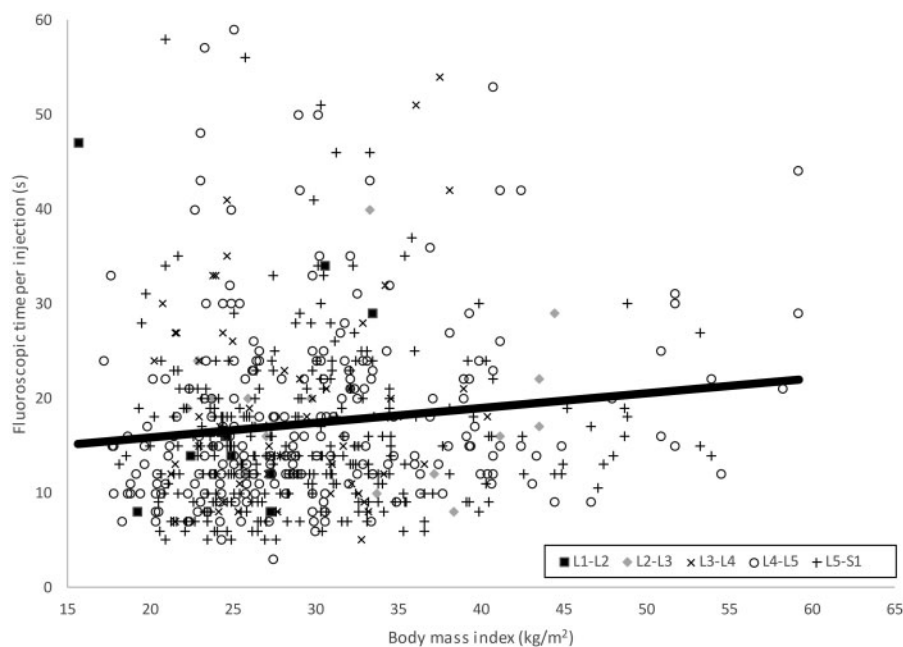**Figure 1** Fluoroscopy time for each patient receiving an interlaminar epidural steroid injection, based on the patient's body mass index. Each level of injection is identified separately. A best-fit line is shown.

traversed to get to the epidural space of patients with increased BMI and reduced radiographic image quality in patients with higher BMI, which provides additional challenge to accurately traversing this additional tissue depth [19,20,36].

Interestingly, when specifically analyzing the fluoroscopy time-BMI relationship stratified by level of transforaminal

LESI, the observation of longer fluoroscopy time with increasing BMI category remained significant only for L5-S1 level injections. While our review of the anatomy literature revealed no prior evidence of greater tissue depth from skin to L5-S1 level epidural access via the transforaminal approach [35], anecdotally, this appears true, and is supported by post-hoc analysis; in the present cohort, 5.0- or 7.0-inch compared to 3.5-inch

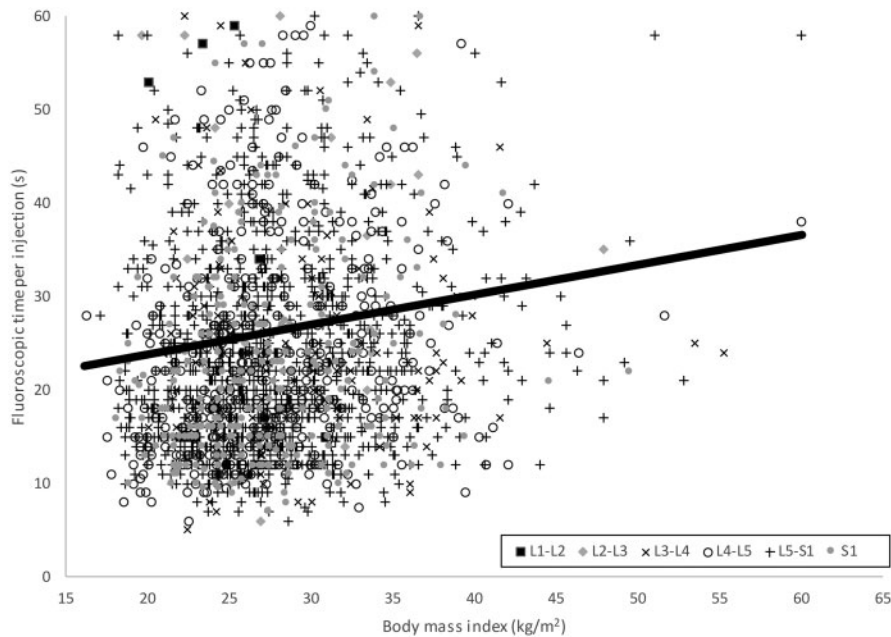

**Figure 2** Fluoroscopy time for each patient receiving a transforaminal epidural steroid injection, based on the patient's body mass index. Each level of injection is identified separately. A best-fit line is shown.

needles were used far more commonly during transforaminal access of the epidural space at the L5-S1 level compared to the L4-L5 and S1 level ( $P < 0.01$ ). This may in part be due to the need for a more cranial needle entry in order to avoid the iliac crest in many patients, which is less of an obstacle for injections at other levels, and thus a less direct route to the epidural space when using an oblique view and co-axial needle technique. Alternatively, it is possible that radiology technicians experience increased difficulty obtaining an appropriate target view for an L5-S1 level transforaminal LESI compared to other levels, and thus require more fluoroscopic imaging time prior to needle entry.

The present data demonstrated that, regardless of BMI category, interlaminar LESI was associated with shorter fluoroscopy time than transforaminal LESI. To speculate, it is possible that providers use less fluoroscopy during interlaminar LESI due to the use of loss-of-resistance technique in combination with confirmatory fluoroscopic guidance, which is not used during transforaminal LESI. Aside from establishing the initial trajectory and confirmation of an epidural contrast pattern under fluoroscopic viewing, providers may check fewer serial fluoroscopic images during needle advancement given the tactile feedback of the loss-of-resistance technique. It is also possible that entry into the interlaminar epidural space compared to the transforaminal epidural space presents less technical challenge; at the most common level of injection in the present study, L5-S1, the neural foramina space is the most narrow in the lumbar spine, and this diameter is further reduced by 20% when the lumbar spine is in a position of extension [37–39], such

as is the case when a patient lays prone on a fluoroscopy table.

Investigation of the effect of trainee involvement on the relationship between fluoroscopy time and BMI yielded unexpected results. For transforaminal LESIs, the presence of a trainee resulted in a shorter duration of fluoroscopy time by 1-3 seconds in all three BMI categories when compared to attending-only injections. To speculate, this may be related to the fact that at the two RIC sites, the most experienced attending physicians work with trainees, while inexperienced attending physicians do not, so the longer fluoroscopy times during attending-only injections may be a reflection of experienced versus inexperienced attending physician operator skill, as the experienced attending physician may often take over an injection from a trainee during supervised procedures. A final theory is that trainees are not permitted to be involved with the more technically difficult and time-intensive patients, at the judgment of the attending physician, thus falsely elevating the fluoroscopic times when trainees are not present.

While the results of this study do provide a powerful estimate of fluoroscopy time and BMI relationship associated with both interlaminar and transforaminal LESIs in an academic practice setting, further study is needed to define the impact of BMI on radiation dose during these procedures. It is likely that there is an even greater increase in radiation exposure beyond the relative increase in fluoroscopy time with increasing BMI category; x-ray output, scatter, and absorption all increase with greater tissue depth between the skin and

neuraxis [40]. Specific quantification of this theoretical increase in radiation dose would be useful given the implications of cumulative exposure with regards to malignancy for both patients and healthcare workers involved with these procedures [21–26]. In particular, clinicians and support staff who treat largely obese populations in certain regions of the country and regularly perform LESIs may incur a significantly greater magnitude of radiation exposure than those in regions with a smaller proportion of obese patients.

Regardless of relative exposure, appropriate radiation safety protocols during fluoroscopically guided spinal injections have been shown to reduce effective exposure to both patients and clinicians. The use of lead aprons, lead barriers, lead table drapes, image collimation, avoidance of image magnification, increasing the camera aperture or electronic gain on the video amplifier rather than increasing current to improve image brightness, the use of pulsed imaging, and increasing distance between the patient and the image intensifier are all methods of decreasing radiation exposure to patients and/or clinicians and staff [41–47].

The feasibility of ultrasound guidance during interlaminar LESI, a technique that does not require radiation exposure, has been investigated [48–50]. While this method does not appear to compromise the procedure time or the number of needle insertion attempts and needle passes [51], this technique has not been investigated in a large enough study sample to determine whether rates of dural puncture, vascular injection, and neurovascular injury are greater compared to interlaminar LESI using fluoroscopic guidance. Further, there is no reported use of ultrasound guidance for transforaminal LESI; this technique as an alternative to fluoroscopic guidance would potentially be even more hazardous than interlaminar LESI, given that arterial injection with possible resulting spinal cord infarction during transforaminal LESI would be challenging to detect without the use of radio-opaque contrast dye. While the use of ultrasound guidance allows avoidance of radiation exposure, the additional risks associated with an improperly placed needle and/or steroid injectate likely outweigh potential benefit, and are currently not recommended by society guidelines [13].

Finally, the limitations of this study must be highlighted to allow appropriate interpretation of the presented data. Heterogeneity of physician and radiology technician experience and training background is represented in this study. While this increases generalizability, the present results may not be accurate for experienced physicians working without trainees in a non-academic setting. Additionally, specific injection and fluoroscopy techniques, as described in the methods section, were used in all patients included in the present dataset. Providers may find different results if common alternative techniques are used, such as the infraneural approach during transforaminal LESI or the contralateral oblique fluoroscopic view during interlaminar LESI. The frequency

of use of digital subtraction angiography was not consistently recorded in the electronic medical record; thus, we could not analyze how the use of this technology might impact fluoroscopy time in patients of different BMI categories. The practice pattern at all centers in this study was rare use of digital subtraction angiography during transforaminal ESIs (<2% of the time) and no use during interlaminar ESIs. When vascular flow was suspected, the needle was typically repositioned. However, in other practice settings, digital subtraction technology may be used more frequently; this may affect fluoroscopy time, and certainly is known to significantly increase radiation dose [51]. Further study is needed to define how patterns and quantity of use of digital subtraction angiography are affected by body habitus. As previously suggested, true radiation dose exposure cannot be accurately extrapolated from fluoroscopy time. While estimates are possible, definitive large-scale study is needed to define the relationship between radiation exposure and BMI during LESI. Finally, this retrospective investigation carries the usual risk of bias associated with such studies, though it is minimized by review of consecutive procedure encounters with only 7% missing data.

## Conclusions

The findings of this study indicate that fluoroscopy time is increased during interlaminar LESIs and during L5-S1 transforaminal LESIs in patients who are obese. These relationships are not affected by injection number, performance of bilateral injections, or trainee involvement. Further study is needed to determine if this increase in fluoroscopy time is indicative of a clinically significant associated increase in radiation dose.

## References

- 1 Friedly J, Chan L, Deyo R. Increases in lumbosacral injections in the Medicare population: 1994 to 2001. *Spine* 2007;32:1754–60.
- 2 Ghahreman A, Ferch R, Bogduk N. The efficacy of transforaminal injection of steroids for the treatment of lumbar radicular pain. *Pain Med* 2010;11:1149–68.
- 3 MacVicar J, King W, Landers MH, Bogduk N. The effectiveness of lumbar transforaminal injection of steroids: A comprehensive review with systematic analysis of the published data. *Pain Med* 2013;14(1):14–28.
- 4 Chang-Chien GC, Knezevic NN, McCormick Z, et al. Transforaminal versus interlaminar approaches to epidural steroid injections: A systematic review of comparative studies for lumbosacral radicular pain. *Pain Physician* 2014;17(4):E509–24.



- 5 Kennedy DJ, Plastaras C, Casey E, et al. Comparative effectiveness of lumbar transforaminal epidural steroid injections with particulate versus nonparticulate corticosteroids for lumbar radicular pain due to intervertebral disc herniation: A prospective, randomized, double-blind trial. *Pain Med* 2014;15(4):548–55.
- 6 Riew KD, Yin Y, Gilula L, et al. The effect of nerve-root injections on the need for operative treatment of lumbar radicular pain. A prospective, randomized, controlled, double-blind study. *J Bone Joint Surg Am* 2000;82A(11):1589–93.
- 7 Koes BW, Scholten RJPM, Mens JMA, Bouter LM. Efficacy of epidural steroid injections for low-back pain and sciatica: A systematic review of randomized clinical trials. *Pain* 1995;63(3):279–88.
- 8 Watts RW, Silagy CA. A meta-analysis on the efficacy of epidural corticosteroids in the treatment of sciatica. *Anaesth Intensive Care* 1995;23(5):564–9.
- 9 Nelemans PJ, de Bie RA, de Vet HCW, Sturmans F. Injection therapy for subacute and chronic benign low-back pain. *Cochrane Database of Syst Rev* 1999;4:CD001824.
- 10 Rados I, Sakic K, Fingler M, Kapural L. Efficacy of interlaminar vs transforaminal epidural steroid injection for the treatment of chronic unilateral radicular pain: Prospective, randomized study. *Pain Med* 2011;12(9):1316–21.
- 11 Barre L, Lutz GE, Southern D, et al. Fluoroscopically guided caudal epidural steroid injections for lumbar spinal stenosis: A retrospective evaluation of long term efficacy. *Pain Physician* 2004;7(2):187–93.
- 12 Johnson BA, Schellhas KP, Pollei SR. Epidurography and therapeutic epidural injections: Technical considerations and experience with 5334 cases. *Am J Neuroradiol* 1999;20(4):697–705.
- 13 April C, Bogduk N, Dreyfuss P, et al. Practice Guidelines for Spinal Diagnostic and Treatment Procedures. First edition. San Francisco, CA: International Spine Intervention Society; 2004.
- 14 Elfering A, Käser A, Melloh M. Relationship between depressive symptoms and acute low back pain at first medical consultation, three and six weeks of primary care. *Psychol Health Med* 2014;19(2):235–46. Epub 2013 Mar 20.
- 15 Chou YC, Shih CC, Lin JG, Chen TL, Liao CC. Low back pain associated with sociodemographic factors, lifestyle and osteoporosis: A population-based study. *J Rehabil Med* 2013;45(1):76–80.
- 16 Hestbaek L, Leboeuf-Yde C, Manniche C. Is low back pain part of a general health pattern or is it a separate and distinctive entity? A critical literature review of comorbidity with low back pain. *J Manipulative Physiol Ther* 2003;26(4):243–52.
- 17 Kaila-Kangas L, Leino-Arjas P, Riihimäki H, Luukkainen R, Kirjonen J. Smoking and overweight as predictors of hospitalization for back disorders. *Spine* 2003;28:1860–8.
- 18 Shiri R, Karppinen J, Leino-Arjas P, et al. Cardiovascular and lifestyle risk factors in lumbar radicular pain or clinically defined sciatica: A systematic review. *Eur Spine J* 2007;16(12):2043–54.
- 19 Uppot RN. Impact of obesity on radiology. *Radiol Clin North Am* 2007;45:231–46.
- 20 Uppot RN, Sahani DV, Hahn PF, Gervais D, Mueller PR. Impact of obesity on medical imaging and image-guided intervention. *Am J Roentgenol* 2007;188(2):433–40.
- 21 Canham CD, Williams RB, Schiffman S, Weinberg EP, Giordano BD. Cumulative radiation exposure to patients undergoing arthroscopic hip preservation surgery and occupational radiation exposure to the surgical team. *Arthroscopy* 2015; pii:S0749-8063(15)00074-2. [Epub ahead of print]
- 22 Pierce DA, Preston DL. Radiation-related cancer risks at low doses among atomic bomb survivors. *Radiat Res* 2000;154:78–86.
- 23 Faulkner K, Vaño E. Deterministic effects in interventional radiology. *Radiat Prot Dosim* 2001;94:95–8.
- 24 Yoshinaga S, Mabuchi K, Sigurdson AJ, Doody MM, Ron E. Cancer risks among radiologists and radiologic technologists: Review of epidemiologic studies. *Radiology* 2004;233:313–21.
- 25 Klein LW, Miller DL, Balter S, et al. Joint inter-society task force on occupational hazards in the interventional laboratory. Occupational health hazards in the interventional laboratory: Time for a safer environment. *J Vasc Interv Radiol* 2009;20(7 suppl): S278–83.
- 26 Brenner DJ, Doll R, Goodhead DT, et al. Cancer risks attributable to low doses of ionizing radiation: Assessing what we really know. *Proc Natl Acad Sci USA* 2003;100:13761–6.
- 27 Ector J, Dragusin O, Adriaenssens B, et al. Obesity is a major determinant of radiation dose in patients undergoing pulmonary vein isolation for atrial

- fibrillation. *J Am Coll Cardiol* 2007;50(3):234–42. Epub 2007 Jun 29.
- 28 Torrecilla Ortiz C, Meza Martínez AI, Vicens Morton AJ, et al. Obesity in percutaneous nephrolithotomy. Is body mass index really important? *Urology* 2014; 84(3):538–43.
- 29 Stanišić MG, Majewska N, Makalowski M, et al. Patient radiation exposure during carotid artery stenting. *Vascular* 2015;23(2):154–60. Epub 2014 Jun 25.
- 30 Baratz MD, Hu YY, Zurakowski D, Appleton P, Rodriguez EK. The primary determinants of radiation use during fixation of proximal femur fractures. *Injury* 2014;45(10):1614–9.
- 31 Smuck M, Zheng P, Chong T, Kao MC, Geisser ME. Duration of fluoroscopic-guided spine interventions and radiation exposure is increased in overweight patients. *PM R* 2013;5(4):291–6; quiz 296.
- 32 Hanu-Cernat DE, Duarte R, Raphael JH, et al. Type of interventional pain procedure, body weight, and presence of spinal pathology are determinants of the level of radiation exposure for fluoroscopically guided pain procedures. *Pain Pract* 2012;12(6):434.
- 33 McCormick Z, Cushman D, Lee D, et al. Is there a relationship between body mass index and fluoroscopy time during sacroiliac joint injection? A Multicenter Cohort Study. *Pain Med* 2015; pii:pnv051. [Epub ahead of print]
- 34 Cushman D, Flis A, Jensen B, McCormick Z. The effect of body mass index on fluoroscopic time and radiation dose during sacroiliac joint injections. *PM R* 2015; pii:S1934–1482(15)01153–3.
- 35 Cushman DM, Mattie R, Clements ND, McCormick ZL. The effect of body mass index on fluoroscopic time and radiation dose during intra-articular hip injections. *PM R* 2016;pii:S1934–1482(16)00044–7.
- 36 Brummett CM, Williams BS, Hurley RW, Erdek MA. A prospective, observational study of the relationship between body mass index and depth of the epidural space during lumbar transforaminal epidural steroid injection. *Reg Anesth Pain Med* 2009;34(2):100–5.
- 37 Demondion X, Lefebvre G, Fisch O, et al. Radiographic anatomy of the intervertebral cervical and lumbar foramina (vessels and variants). *Diagn Interv Imaging* 2012;93(9):690–7.
- 38 Panjabi MM, Takata K, Goel VK. Kinematics of lumbar intervertebral foramen. *Spine* 1983;8(4):348–57.
- 39 Inufusa A, An HS, Lim TH, et al. Anatomic changes of the spinal canal and intervertebral foramen associated with flexion-extension movement. *Spine* 1996;21(21):2412–20.
- 40 Carucci LR. Imaging obese patients: Problems and solutions. *Abdom Imaging* 2013;38(4):630–46.
- 41 Manchikanti L, Cash KA, Moss TL, Rivera J, Pampati V. Risk of whole body radiation exposure and protective measures in fluoroscopically guided interventional techniques: A prospective evaluation. *BMC Anesthesiol* 2003;3(1):2.
- 42 Zhou Y, Singh N, Abdi S, et al. Fluoroscopy radiation safety for spine interventional pain procedures in university teaching hospitals. *Pain Physician* 2005; 8(1):49–53.
- 43 Plastaras C, Appasamy M, Sayeed Y, et al. Fluoroscopy procedure and equipment changes to reduce staff radiation exposure in the interventional spine suite. *Pain Physician* 2013;16(6):E731–8.
- 44 Goodman BS, Carnel CT, Mallempati S, Agarwal P. Reduction in average fluoroscopic exposure times for interventional spinal procedures through the use of pulsed and low-dose image settings. *Am J Phys Med Rehabil* 2011;90(11):908–12.
- 45 Cho JH, Kim JY, Kang JE, et al. A study to compare the radiation absorbed dose of the c-arm fluoroscopic modes. *Korean J Pain* 2011;24(4):199–204.
- 46 Slegers AS, Gültuna I, Aukes JA, et al. Coaching reduced the radiation dose of pain physicians by half during interventional procedures. *Pain Pract* 2014;15(5):400–6.
- 47 Buckley O, Ward E, Ryan A, et al. European obesity and the radiology department. What can we do to help? *Eur Radiol* 2009;19(2):298–309.
- 48 Jee H, Lee JH, Kim J, et al. Ultrasound-guided selective nerve root block versus fluoroscopy-guided transforaminal block for the treatment of radicular pain in the lower cervical spine: A randomized, blinded, controlled study. *Skeletal Radiol* 2013;42(1):69–78.
- 49 Narouze SN, Vydyanathan A, Kapural L, Sessler DI, Mekhail N. Ultrasound-guided cervical selective nerve root block: A fluoroscopy-controlled feasibility study. *Reg Anesth Pain Med* 2009;34(4):343–8.

- 50 Evansa I, Logina I, Vanags I, Borgeat A. Ultrasound versus fluoroscopic-guided epidural steroid injections in patients with degenerative spinal diseases: A randomised study. *Eur J Anaesthesiol* 2015;32(4):262–8.
- 51 Maus T, Schueler BA, Leng S, et al. Radiation dose incurred in the exclusion of vascular filling in transforaminal epidural steroid injections: Fluoroscopy, digital subtraction angiography, and CT/fluoroscopy. *Pain Med* 2014;15(8):1328–33.
